# Supplementary material for: Methods to characterize type, relevance, and interactions of organic matter and microorganisms in fluids along the flow path of a geothermal facility
Source: Copernicus journal article supplement (doi:10.5194/bg-21-5457-2024), 2024-12-09
Supplement: Supplementary file 1 [file bg-21-5457-2024-supplement.zip]

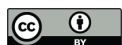

## *Supplement of*

# **Methods to characterize type, relevance, and interactions of organic matter and microorganisms in fluids along the flow path of a geothermal facility**

**Alessio Leins et al.**

*Correspondence to:* Alessio Leins (leins@gfz-potsdam.de)

- bg-21-5457-2024-supplement-title-page.pdf
- Supplements\_FTICRMS\_APPI\_data.xlsx
- Supplements\_FTICRMS\_ESI\_data.xlsx

The copyright of individual parts of the supplement might differ from the article licence.
